# Supplementary material
Source: Springer Nature journal article supplement (https://www.springermedizin.de/resource/supplementary/13045_2013_345_MOESM9_ESM.pdf/9661174)

A

### Overall survival in patients with BMI (n = 327)

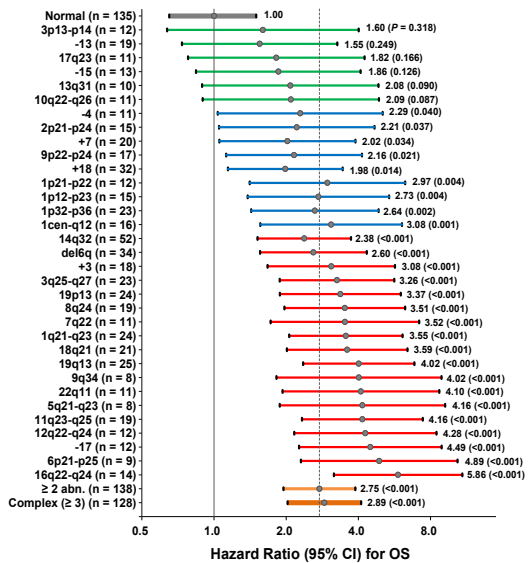

### Progression-free survival in patients with BMI (n = 327)

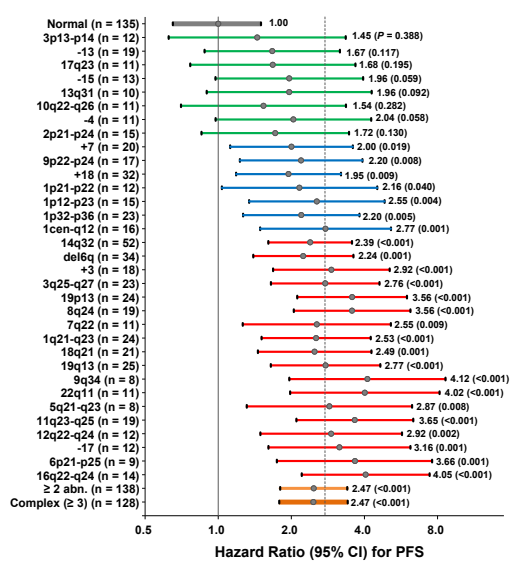

B

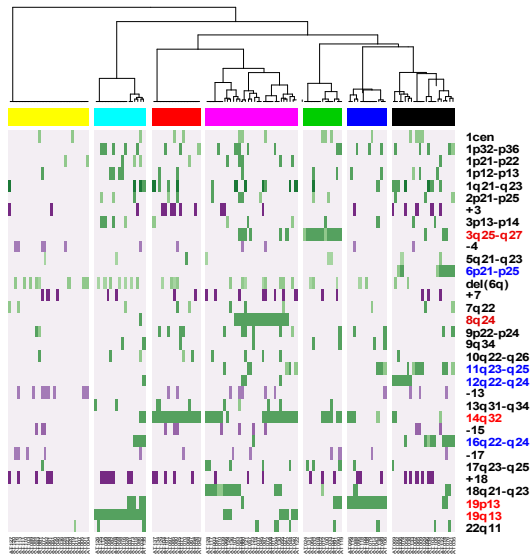

C

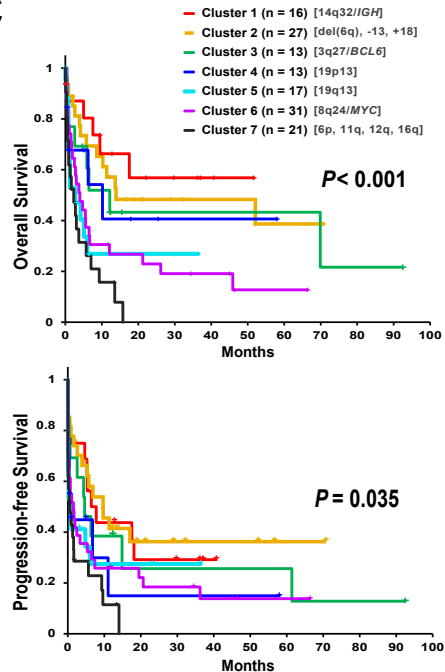

Supplement: MOESM9 [file 9661174]
